# Supplementary material for: GWAS Atlas: an updated knowledgebase integrating more curated associations in plants and animals
Source: PubMed Central journal article supplement — Nucleic Acids Res. 2022 Oct 20;51(D1):D969–76. doi: 10.1093/nar/gkac924 (PMC9825481; doi:10.1093/nar/gkac924), 2022-10-20
Supplement: gkac924_supplemental_file.pdf [file gkac924_supplemental_file.pdf]

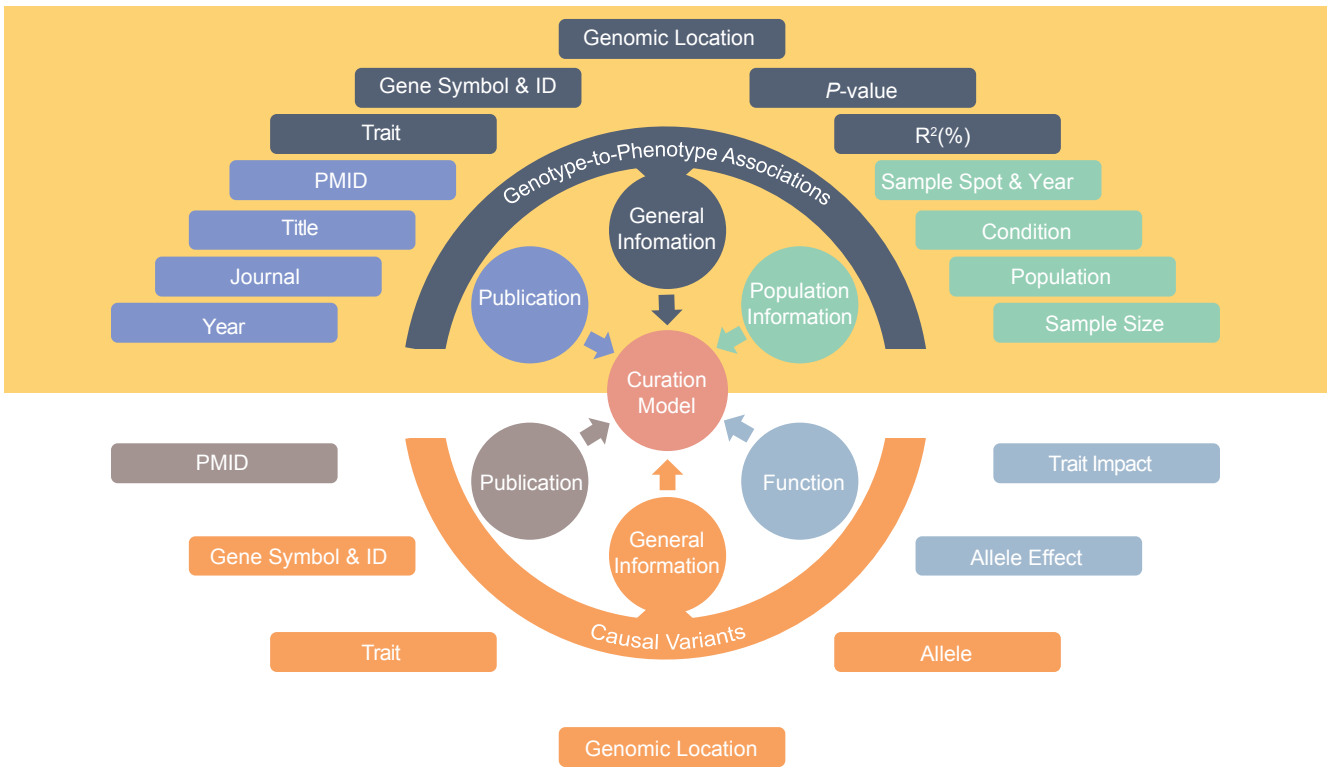

**Supplemental Figure S1.** Curation models of genotype-to-phenotype associations and causal variants.

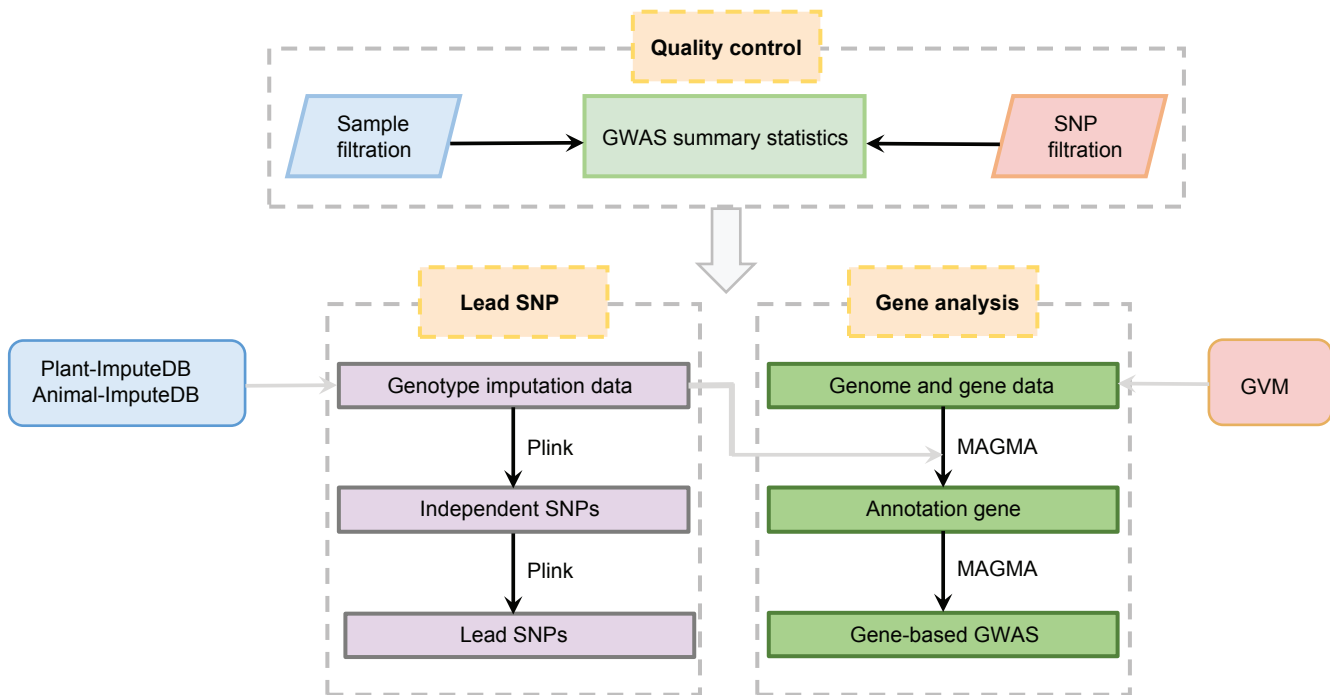

**Supplemental Figure S2.** Comprehensive workflow of lead SNP analysis and gene analysis.

| Variant ID | Genomic Location | Traits           | P-values | R <sup>2</sup> (%) | Genes (Consequence Types)                                                                                                                                        | Lead SNPs | PMID     |
|------------|------------------|------------------|----------|--------------------|------------------------------------------------------------------------------------------------------------------------------------------------------------------|-----------|----------|
| osa8688999 | chr6:1765761     | amylose content  | 2.91E-27 | 20.49              | Os06g0133000 (upstream_gene_variant)<br>Os06g0132600 (upstream_gene_variant)<br>Os06g0132801 (downstream_gene_variant)<br>Os06g0133100 (downstream_gene_variant) | Leader    | 21915109 |
| osa8688999 | chr6:1765761     | albumin content  | 8.6E-16  | 20.9               | Os06g0133000 (upstream_gene_variant)<br>Os06g0132600 (upstream_gene_variant)<br>Os06g0132801 (downstream_gene_variant)<br>Os06g0133100 (downstream_gene_variant) | Leader    | 29868069 |
| osa8688999 | chr6:1765761     | amylose content  | 1.19E-22 | -                  | Os06g0133000 (upstream_gene_variant)<br>Os06g0132600 (upstream_gene_variant)<br>Os06g0132801 (downstream_gene_variant)<br>Os06g0133100 (downstream_gene_variant) | Leader    | 34408762 |
| osa8688999 | chr6:1765761     | amylose content  | 1.0E-11  | -                  | Os06g0133000 (upstream_gene_variant)<br>Os06g0132600 (upstream_gene_variant)<br>Os06g0132801 (downstream_gene_variant)<br>Os06g0133100 (downstream_gene_variant) | Leader    | 27179918 |
| osa8688999 | chr6:1765761     | amylose content  | 7.27E-51 | 65.3               | Os06g0133000 (upstream_gene_variant)<br>Os06g0132600 (upstream_gene_variant)<br>Os06g0132801 (downstream_gene_variant)<br>Os06g0133100 (downstream_gene_variant) | Leader    | 32886450 |
| osa8688999 | chr6:1765761     | 100-grain weight | 1.76E-18 | 33.62              | Os06g0133000 (upstream_gene_variant)<br>Os06g0132600 (upstream_gene_variant)<br>Os06g0132801 (downstream_gene_variant)<br>Os06g0133100 (downstream_gene_variant) | Leader    | 32886450 |

  

| Variant ID | Genomic Location | Traits                             | P-values | R <sup>2</sup> (%) | Genes (Consequence Types)                                                                                         | Lead SNPs | PMID     |
|------------|------------------|------------------------------------|----------|--------------------|-------------------------------------------------------------------------------------------------------------------|-----------|----------|
| osa8689111 | chr6:1768006     | protein content                    | 1.02E-12 | -                  | Os06g0133000 (missense_variant)<br>Os06g0133000 (splice_region_variant)<br>Os06g0133100 (downstream_gene_variant) | Leader    | 32303966 |
| osa8689111 | chr6:1768006     | amylose content                    | 8.99E-19 | -                  | Os06g0133000 (missense_variant)<br>Os06g0133000 (splice_region_variant)<br>Os06g0133100 (downstream_gene_variant) | Leader    | 32303966 |
| osa8689111 | chr6:1768006     | whiteness degree of dead grain     | 2.76E-11 | -                  | Os06g0133000 (missense_variant)<br>Os06g0133000 (splice_region_variant)<br>Os06g0133100 (downstream_gene_variant) | Leader    | 32303966 |
| osa8689111 | chr6:1768006     | whiteness degree of complete grain | 4.55E-10 | -                  | Os06g0133000 (missense_variant)<br>Os06g0133000 (splice_region_variant)<br>Os06g0133100 (downstream_gene_variant) | Leader    | 32303966 |

  

| Variant ID | Genomic Location | Traits              | P-values | R <sup>2</sup> (%) | Genes (Consequence Types)                                                   | Lead SNPs | PMID     |
|------------|------------------|---------------------|----------|--------------------|-----------------------------------------------------------------------------|-----------|----------|
| osa8689139 | chr6:1768724     | breakdown viscosity | 2.79E-12 | 17.0               | Os06g0133000 (synonymous_variant)<br>Os06g0133100 (downstream_gene_variant) | Leader    | 34510797 |
| osa8689139 | chr6:1768724     | amylose content     | 6.21E-19 | 41.0               | Os06g0133000 (synonymous_variant)<br>Os06g0133100 (downstream_gene_variant) | Leader    | 34510797 |

Supplemental Figure S3. Screenshots for three lead variants in *WX1*.
